# Supplementary material for: Preparation and properties of a novel form-stable phase change material based on a gelator
Source: Royal Society of Chemistry journal article supplement (doi:10.1039/c4ta06508e), 2014-12-08
Supplement: c4ta06508e1.pdf [file c4ta06508e1.pdf]

## Preparation and Properties of a Novel Form-stable Phase Change Material Based on Gelator

Dang Wu, Wen Wen, Sheng Chen\* and Hailiang Zhang\*

Received (in XXX, XXX) Xth XXXXXXXXXX 20XX, Accepted Xth XXXXXXXXXX 20XX

5 DOI: 10.1039/b000000x

## 1. Synthesis of gelators:

Take *N, N'*-distearoyl-4, 4' -diaminodiphenylmethane (G18) as the example, the details were described as follows: First, synthetic stearoyl chloride: 22.72 g (0.08 mol) stearic acid and 30 ml THF was placed into a 250 ml round bottomed flask equipped with a magnetic stirrer, followed by drop 12.00 g (0.12 mol) thionyl chloride at room temperature. Then, the flask was equipped with a condenser and heated to reflux with an oil bath. After refluxing for 4 h, the excess thionyl chloride was removed by distillation under reduced pressure. The stearoyl chloride product was a light red liquid. Afterwards, a solution of 6.34 g (0.032 mol) 4, 4'-diaminodiphenylmethane and 8.50 g (0.082 mol) triethylamine in 30 ml THF was added dropwise to the stirred acid chloride at 40 °C. The mixture was stirred for 2 h and was subsequently poured into a large amount of acetone. A white precipitate was filtered off, and then washed with 5 wt% NaOH aqueous solution, 1 wt% HCl aqueous solution and pure THF two times, respectively. Yield: 90%. mp: 167.8 °C. <sup>1</sup>H NMR (CDCl<sub>3</sub>, ppm, δ): 0.82-0.94 (h, 6H, -CH<sub>3</sub>), 1.14-1.43 (g, 32H, -CH<sub>2</sub>-), 1.66-1.78 (f, 4H, -CH<sub>2</sub>-), 2.27-2.40 (e, 4H, -CH<sub>2</sub>-), 3.87-3.93 (a, 2H, -CH<sub>2</sub>-), 7.04 (d, 2H, -NH-CO-), 7.07-7.19 (b, 4H, Ar-H), 7.38-7.49(c, 4H, Ar-H). Mass Spectrometry (MS) (m/z) [M] Calcd for C<sub>49</sub>H<sub>82</sub>N<sub>2</sub>O<sub>2</sub>, 731.19; found, 731.751.

*N, N'*-hexadecanoyl-4, 4'-diaminodiphenylmethane (G16): Yield: 88%. mp: 176.2 °C. <sup>1</sup>H NMR (CDCl<sub>3</sub>, ppm, δ): 0.80-0.92 (h, 6H, -CH<sub>3</sub>), 1.13-1.45 (g, 48H, -CH<sub>2</sub>-), 1.64-1.77 (f, 4H, -CH<sub>2</sub>-), 2.25-2.40 (e, 4H, -CH<sub>2</sub>-), 3.86-3.93 (a, 2H, -CH<sub>2</sub>-), 7.04 (d, 2H, -NH-CO-), 7.07-7.19 (b, 4H, Ar-H), 7.38-7.49(c, 4H, Ar-H). Mass Spectrometry (MS) (m/z) [M] Calcd for C<sub>45</sub>H<sub>74</sub>N<sub>2</sub>O<sub>2</sub>, 675.08; found, 675.833.

*N, N'*-myristoyl-4, 4'-diaminodiphenylmethane (G14): Yield: 85%. mp: 178.3 °C. <sup>1</sup>H NMR (CDCl<sub>3</sub>, ppm, δ): 0.81-0.94 (h, 6H, -CH<sub>3</sub>), 1.13-1.43 (g, 40H, -CH<sub>2</sub>-), 1.66-1.77 (f, 4H, -CH<sub>2</sub>-), 2.25-2.40 (e, 4H, -CH<sub>2</sub>-), 3.86-3.93 (a, 2H, -CH<sub>2</sub>-), 7.04 (d, 2H, -NH-CO-), 7.07-7.19 (b, 4H, Ar-H), 7.38-7.49(c, 4H, Ar-H). Mass Spectrometry (MS) (m/z) [M] Calcd for C<sub>41</sub>H<sub>66</sub>N<sub>2</sub>O<sub>2</sub>, 618.97; found, 619.749.

*N, N'*-dodecanoyl-4, 4'-diaminodiphenylmethane (G12): Yield:

86%. mp: 183 – 180.8 °C. <sup>1</sup>H NMR (CDCl<sub>3</sub>, ppm, δ): 0.80-0.97 (h, 6H, -CH<sub>3</sub>), 1.08-1.47 (g, 32H, -CH<sub>2</sub>-), 1.64-1.76 (f, 4H, -CH<sub>2</sub>-), 2.27-2.39 (e, 4H, -CH<sub>2</sub>-), 3.90 (a, 2H, -CH<sub>2</sub>-), 7.03 (d, 2H, -NH-CO-), 7.05-7.16 (b, 4H, Ar-H), 7.45-7.85(c, 4H, Ar-H). Mass Spectrometry (MS) (m/z) [M] Calcd for C<sub>37</sub>H<sub>58</sub>N<sub>2</sub>O<sub>2</sub>, 562.87; found, 563.667.

50 *N, N'*-decanoyl-4, 4'-diaminodiphenylmethane (G10): Yield: 85%. mp: 185.3 °C. <sup>1</sup>H NMR (CDCl<sub>3</sub>, ppm, δ): 0.82-0.93 (h, 6H, -CH<sub>3</sub>), 1.18-1.47 (g, 24H, -CH<sub>2</sub>-), 1.62-1.76 (f, 4H, -CH<sub>2</sub>-), 2.25-2.39 (e, 4H, -CH<sub>2</sub>-), 3.91 (a, 2H, -CH<sub>2</sub>-), 7.04 (d, 2H, -NH-CO-), 7.06-7.14 (b, 4H, Ar-H), 7.41-7.75(c, 4H, Ar-H). Mass Spectrometry (MS) (m/z) [M] Calcd for C<sub>33</sub>H<sub>50</sub>N<sub>2</sub>O<sub>2</sub>, 506.76; found, 507.421.

*N, N'*-caprylyl-4, 4'-diaminodiphenylmethane (G8): Yield: 88%. mp: 189.3 °C. <sup>1</sup>H NMR (CDCl<sub>3</sub>, ppm, δ): 0.89 (h, 6H, -CH<sub>3</sub>), 1.20-1.38 (g, 16H, -CH<sub>2</sub>-), 1.60-1.76 (f, 4H, -CH<sub>2</sub>-), 2.26-2.40 (e, 4H, -CH<sub>2</sub>-), 3.89 (a, 2H, -CH<sub>2</sub>-), 7.05-7.15 (b, 4H, Ar-H), 7.04 (d, 2H, -NH-CO-), 7.35-7.49(c, 4H, Ar-H). Mass Spectrometry (MS) (m/z) [M] Calcd for C<sub>29</sub>H<sub>42</sub>N<sub>2</sub>O<sub>2</sub>, 450.66; found, 451.514.

*N, N'*-hexanoyl-4, 4'-diaminodiphenylmethane (G6): Yield: 90%. mp: 192.5 °C. <sup>1</sup>H NMR (CDCl<sub>3</sub>, ppm, δ): 0.90 (h, 6H, -CH<sub>3</sub>), 1.34 (g, 12H, -CH<sub>2</sub>-), 1.62-1.81 (f, 4H, -CH<sub>2</sub>-), 2.25-2.40 (e, 4H, -CH<sub>2</sub>-), 3.89 (a, 2H, -CH<sub>2</sub>-), 7.03-7.15 (b, 4H, Ar-H), 7.19 (d, 2H, -NH-CO-), 7.35-7.49(c, 4H, Ar-H). Mass Spectrometry (MS) (m/z) [M] Calcd for C<sub>25</sub>H<sub>34</sub>N<sub>2</sub>O<sub>2</sub>, 394.55; found, 395.419.

*N, N'*-butyryl-4, 4'-diaminodiphenylmethane (G4): Yield: 88%. mp: 202.8 °C. <sup>1</sup>H NMR (CDCl<sub>3</sub>, ppm, δ): 0.99 (g, 6H, -CH<sub>3</sub>), 1.72-1.86 (f, 4H, -CH<sub>2</sub>-), 2.19-2.25 (e, 4H, -CH<sub>2</sub>-), 3.89 (a, 2H, -CH<sub>2</sub>-), 7.05-7.16 (b, 4H, Ar-H), 7.21 (d, 2H, -NH-CO-), 7.45-7.85(c, 4H, Ar-H). Mass Spectrometry (MS) (m/z) [M] Calcd for C<sub>21</sub>H<sub>26</sub>N<sub>2</sub>O<sub>2</sub>, 338.44; found, 339.265.

*N, N'*-acetyl-4, 4'-diaminodiphenylmethane (G2): Yield: 85%. mp: 233.8 °C. <sup>1</sup>H NMR (CDCl<sub>3</sub>, ppm, δ): 2.06 (e, 6H, -CH<sub>3</sub>), 3.87 (a, 2H, -CH<sub>2</sub>-), 7.24 (d, 2H, -NH-CO-), 7.07-7.19 (b, 4H, Ar-H), 7.38-7.49(c, 4H, Ar-H). Mass Spectrometry (MS) (m/z) [M] Calcd for C<sub>17</sub>H<sub>18</sub>N<sub>2</sub>O<sub>2</sub>, 282.34; found, 283.147.

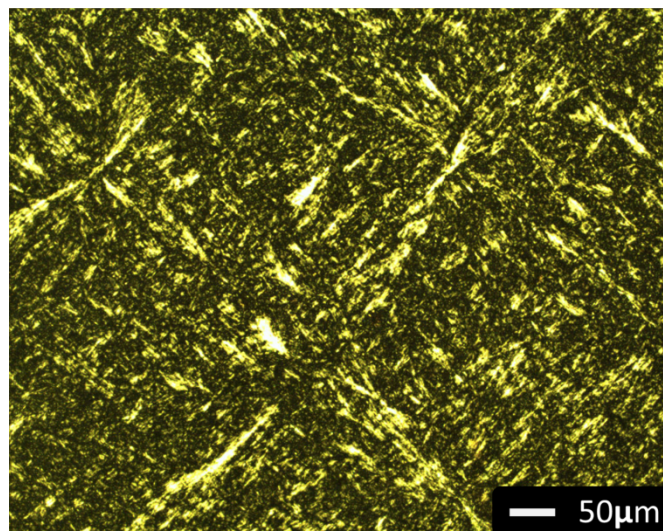

Fig.S1 POM images ( $\times 200$ ) of neat G18.

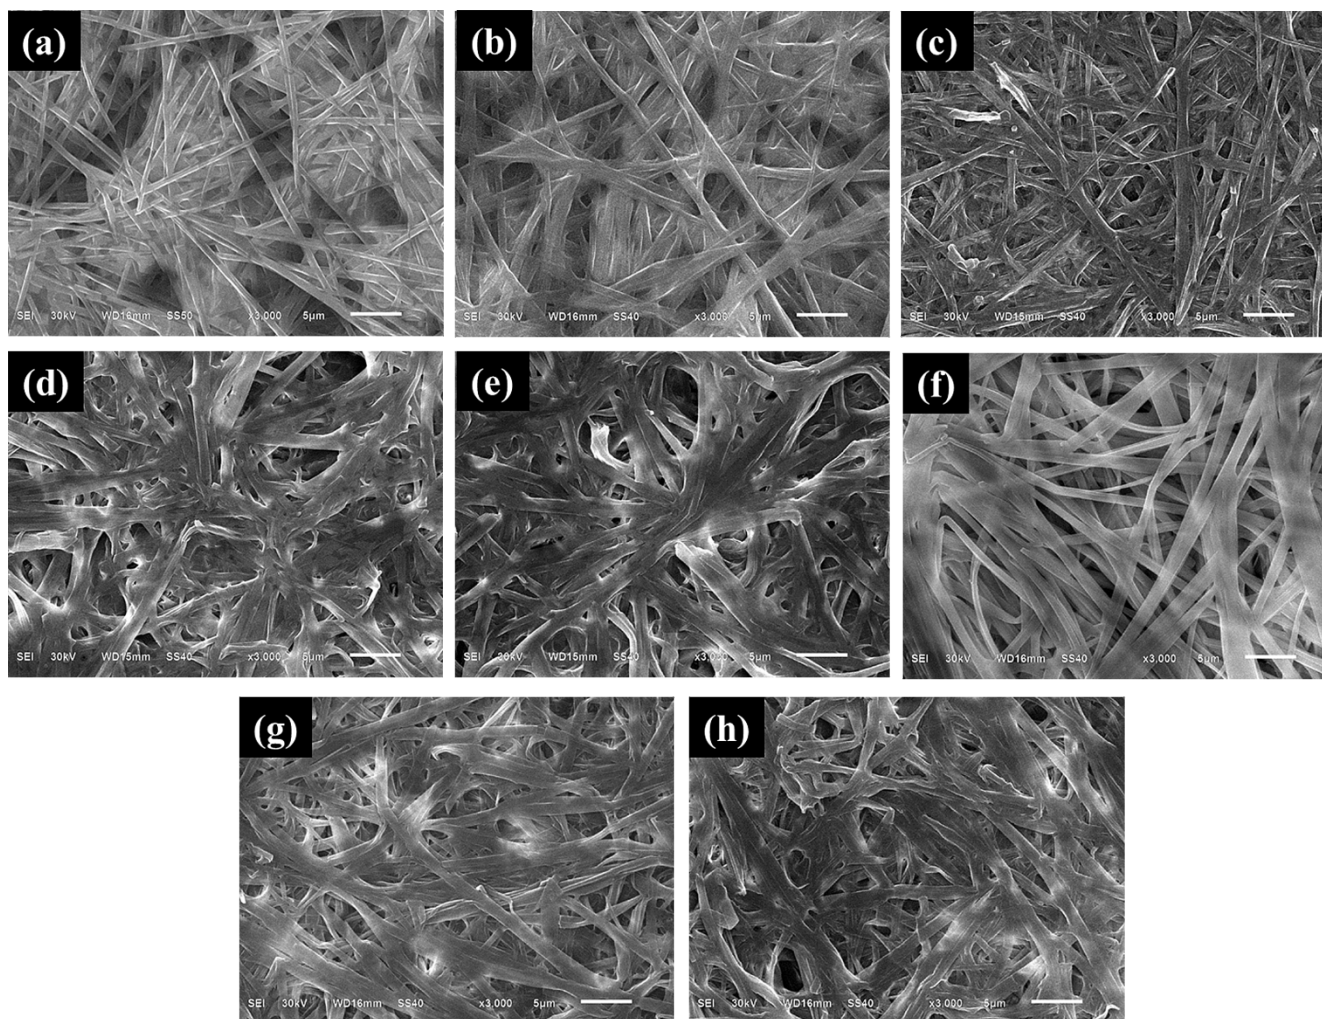

5 Fig.S2 SEM images of G18/paraffin composite xerogels at different concentration: (a) 0.5 wt%, (b) 1 wt%, (c) 2 wt%, (d) 3 wt%, (e) 4 wt%, (f) 6 wt%, (g) 8 wt%, (h) 10 wt%, respectively. Scale bar = 5  $\mu\text{m}$ .

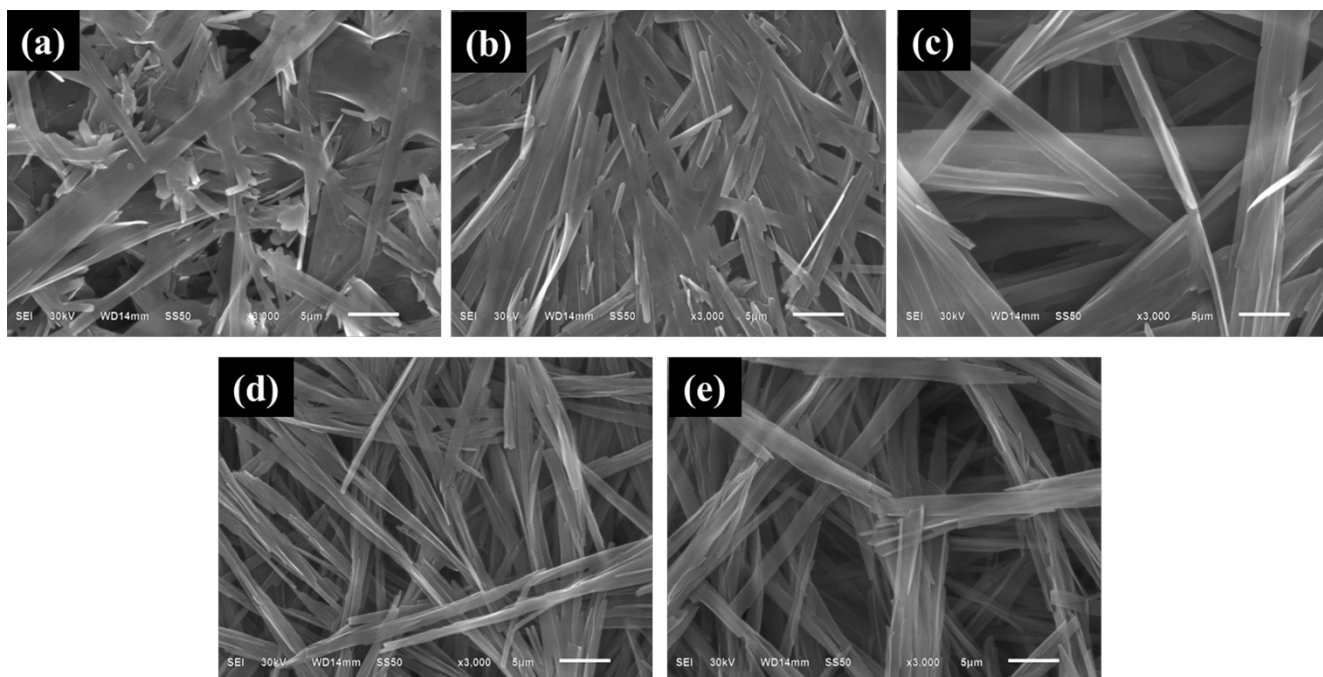

**Fig.S3** SEM images Gm/paraffin composite xerogels at the same concentration: (a) G8/paraffin composite, (b) G10/paraffin composite, (c) G12/paraffin composite, (d) G14/paraffin composite, (e) G16/paraffin composite, respectively. Concentration = 3 wt%. Scale bar = 5  $\mu\text{m}$ .

**5 Table S1** The thermal characteristics of Gm/paraffin composites (m = 8, 10, 12, 14, 16).

|                   | Melting                                      |                                                                  |                                                                 | Freezing                                     |                                                                  |                                                                 |
|-------------------|----------------------------------------------|------------------------------------------------------------------|-----------------------------------------------------------------|----------------------------------------------|------------------------------------------------------------------|-----------------------------------------------------------------|
|                   | $T_m$<br>( $^{\circ}\text{C}$ ) <sup>a</sup> | $\Delta H_{\text{Hobs m}}$<br>( $\text{J g}^{-1}$ ) <sup>a</sup> | $\Delta H_{\text{The m}}$<br>( $\text{J g}^{-1}$ ) <sup>b</sup> | $T_f$<br>( $^{\circ}\text{C}$ ) <sup>a</sup> | $\Delta H_{\text{Hobs f}}$<br>( $\text{J g}^{-1}$ ) <sup>a</sup> | $\Delta H_{\text{The f}}$<br>( $\text{J g}^{-1}$ ) <sup>b</sup> |
| 3 wt%G8/paraffin  | 58.3                                         | 170.5                                                            | 183.6                                                           | 51.9                                         | 172.1                                                            | 178.9                                                           |
| 3 wt%G10/paraffin | 58.5                                         | 180.1                                                            | 183.6                                                           | 51.9                                         | 181.8                                                            | 178.9                                                           |
| 3 wt%G12/paraffin | 58.1                                         | 182.7                                                            | 183.6                                                           | 51.7                                         | 184.1                                                            | 178.9                                                           |
| 3 wt%G14/paraffin | 58.8                                         | 172.8                                                            | 183.6                                                           | 51.1                                         | 172.8                                                            | 178.9                                                           |
| 3 wt%G16/paraffin | 59.2                                         | 171.8                                                            | 183.6                                                           | 50.6                                         | 177.0                                                            | 178.9                                                           |

<sup>a</sup> Evaluated by DSC during the second heating process at a rate of 5  $^{\circ}\text{C min}^{-1}$  under nitrogen atmosphere.

<sup>b</sup> Calculated by multiplying the weight percentage of paraffin in the composite PCM by the melting or freezing enthalpies of pure paraffin.
